# Supplementary material for: Direct binding of CEP85 to STIL ensures robust PLK4 activation and efficient centriole assembly
Source: PubMed Central journal article supplement (PMC5928214; doi:10.1038/s41467-018-04122-x), 2018-04-30
Supplement: 41467_2018_4122_MOESM4_ESM.pdf [file 41467_2018_4122_MOESM4_ESM.pdf]

## Supplementary Information

### Direct binding of CEP85 to STIL ensures robust PLK4 activation and efficient centriole assembly

Liu et al.

Description of Additional Supplementary Files

File Name: Supplementary Data 1

Description: High confidence proximity interactors for centriole duplication factors.

#### Supplementary Data 1 legend

**Supplementary Data 1.** (a) High confidence proximity interactors for centriole duplication factors (TPP > 0.9, unique peptides  $\geq 2$ , FDR ~1%). Font and background colours as described in Table inset. SAINT analysis conducted using 14 control runs (FLAG-BirA\* alone). For each Bait protein, two technical replicates were conducted on each of two biological samples (shown only for *bona fide* interactors with a FDR~1%); (b, c) Mass spectrometry raw analysis (TPP>0.9, unique peptides  $\geq 2$ ); (d) Bait and interactor annotations (see Supplementary Figure 1a); (e) Cilia and Centrosome data base (CCDB), as assembled in Gupta *et al*<sup>1</sup>(Supplementary Table 3 in that reference).

#### Supplementary Reference

1. Gupta, Gagan D. *et al.* A Dynamic Protein Interaction Landscape of the Human Centrosome-Cilium Interface. *Cell* **163**, 1484-1499 (2015).
